# Supplementary material for: HD-Zip III Gene Family: Identification and Expression Profiles during Leaf Vein Development in Soybean
Source: MDPI journal article supplement (doi:10.3390/plants11131728), 2022-06-29
Supplement: s1 [file s1]

Article

# HD-Zip III Gene Family: Identification and Expression Profiles During Leaf Vein Development in Soybean

Jing Gao <sup>1,2,†</sup>, Jiyu Chen <sup>1,2,†</sup>, Lingyang Feng <sup>1,2</sup>, Qi Wang <sup>1,2</sup>, Shenglan Li <sup>1,2</sup>, Xianming Tan <sup>1,2</sup>, Feng Yang <sup>1,2,\*</sup> and Wenyu Yang <sup>1,2</sup>

## Supplementary Materials

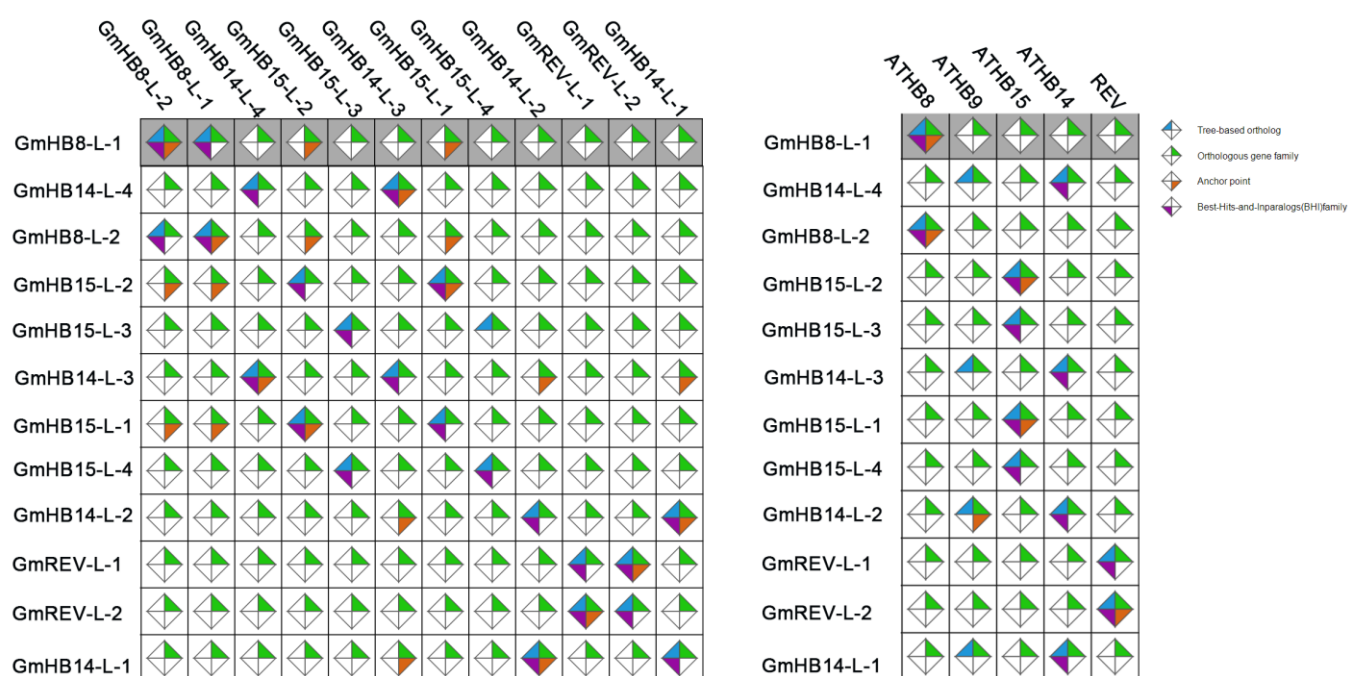

**Figure S1.** Orthologous genes between soybean and Arabidopsis. List of orthologous gene pairs obtained from PLAZA.

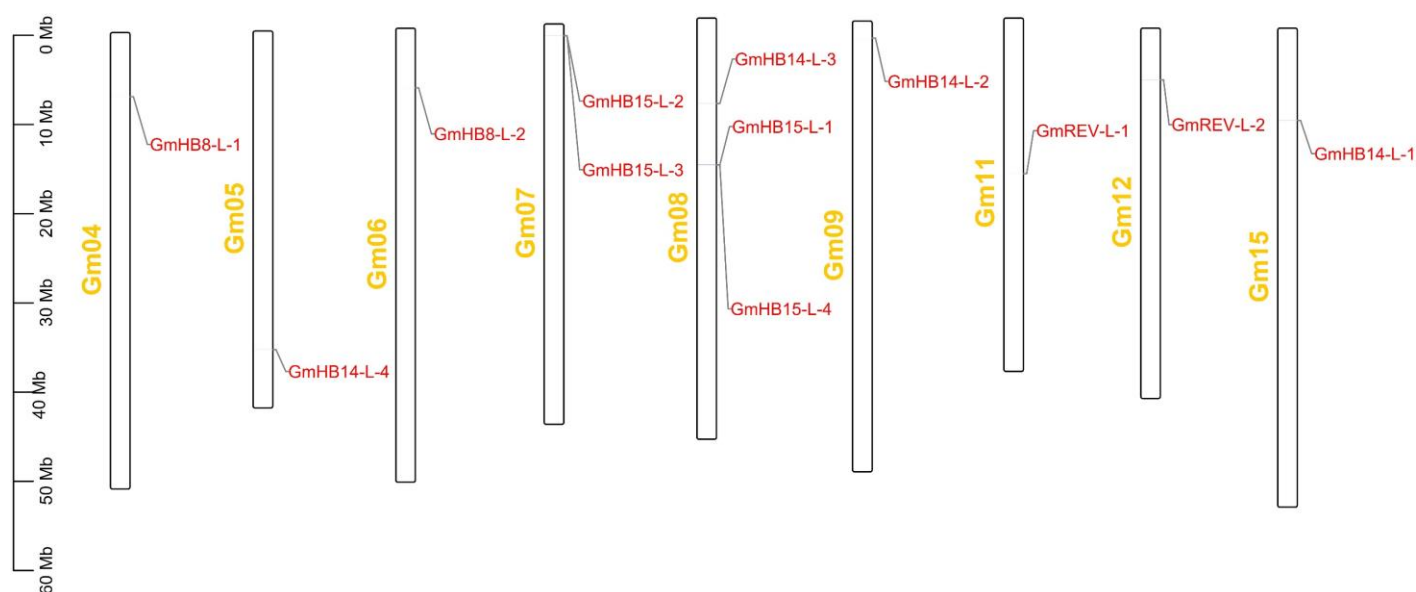

**Figure S2.** Chromosomal distributions of the identified soybean HD-Zip III genes. Chromosomal locations are shown from top to bottom on the corresponding chromosomes. The bar on the left side indicates chromosome sizes in mega-bases. The scale represents chromosome length.

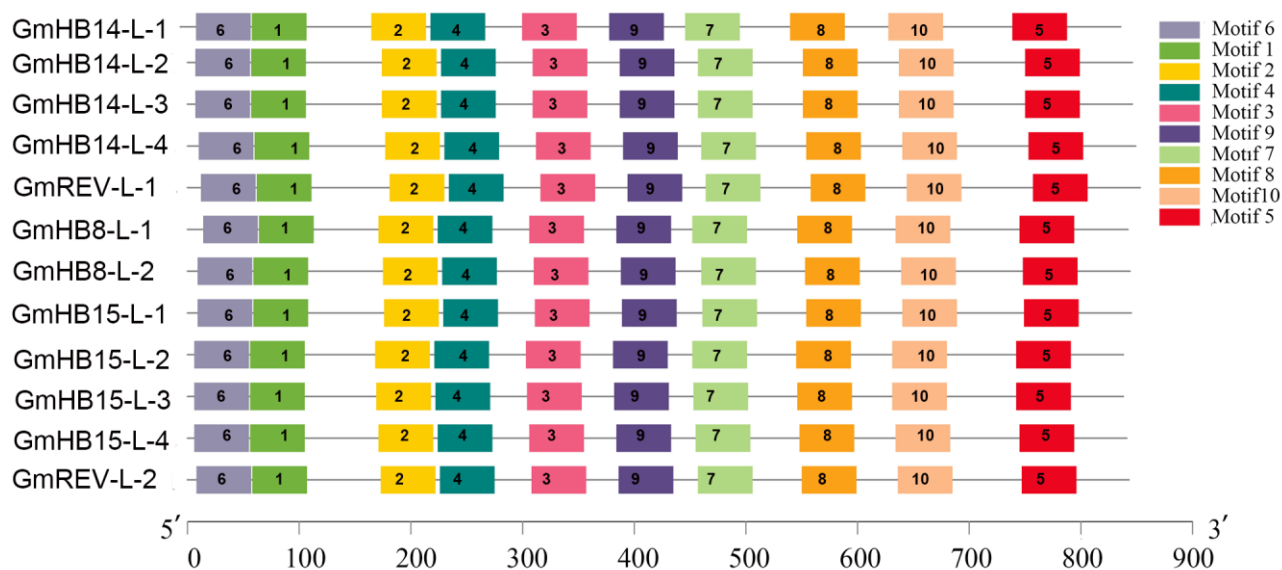

**Figure S3.** Motif of the 12 GmHD-Zip III proteins. Different colored boxes stand for different motifs. The length of each box in the figure represents the actual size of the motif in the proteins.

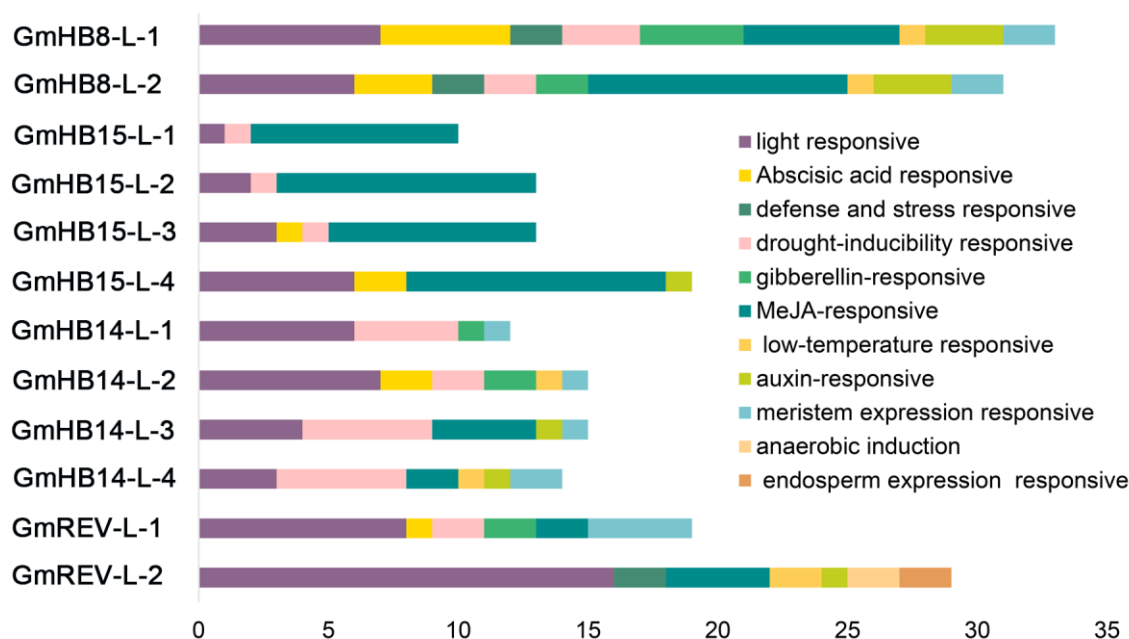

Figure S4. Analysis of cis-acting elements in the promoter regions of GmHD-Zip III family genes.

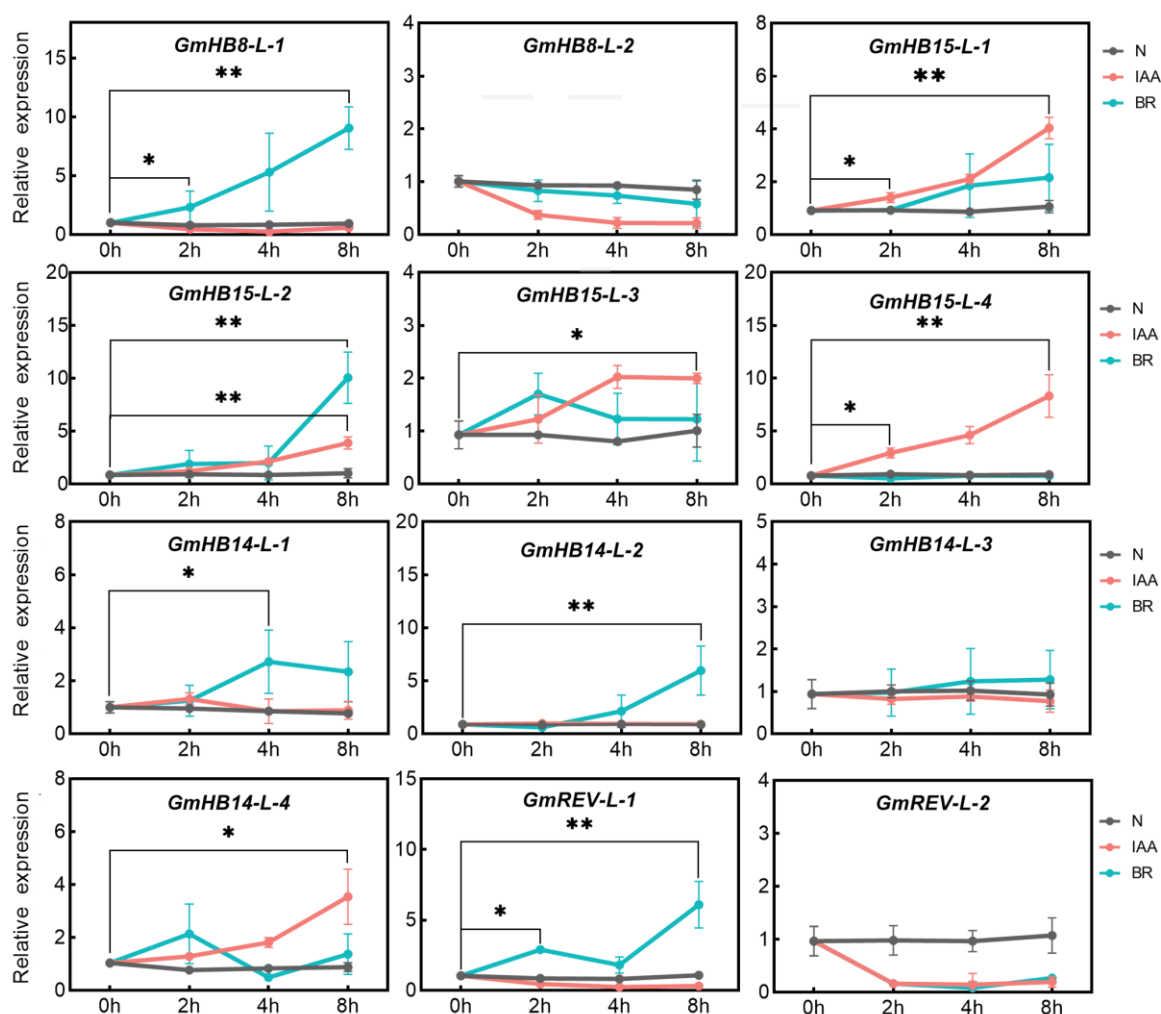

Figure S5. Expression profiles of GmHD-Zip III under IAA and BR treatment. Asterisks on top of the bars indicate statistically significant differences (\*P < 0.05, \*\*P < 0.01).

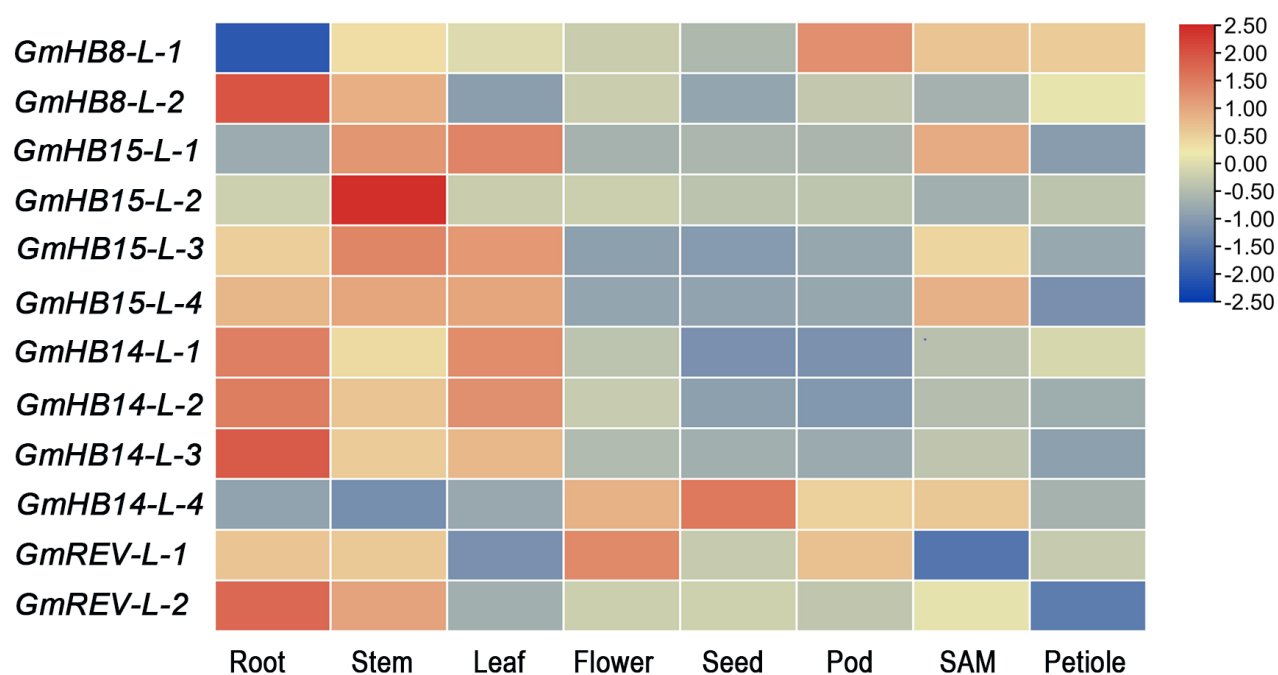

**Figure S6.** Expression profiles of *GmHD-Zip III* genes in eight soybean tissues in reads/Kb/million. The normalized values of gene expression were log2-transformed and visualized in the form of heatmaps.

**Table S1.** Primers sequences used in qRT-PCR.

| GeneID          | Forward primer (5'→3')    | Reverse primer (5'→3')    |
|-----------------|---------------------------|---------------------------|
| GLYMA_04G085000 | GAGTGGGTCCAAATGCCTGG      | CTAGACCAACAAGGCCGCAG      |
| GLYMA_06G086600 | ACTCAGCTCATTCTGGGAGC      | GTGAGAACCAAAGCGCGAAG      |
| GLYMA_08G201900 | GCTGCCTAGTGGGTACCTGA      | CAGTGGGCGTAGCACTTCTG      |
| GLYMA_07G016500 | ACACCCAGATTACTACGCAGG     | TTATCAAATTGTGCTGCTGACCAC  |
| GLYMA_07G016700 | GCCTGGAATGAAGCCTGGTC      | CCTGAAACCACAAAGGCCGA      |
| GLYMA_08G202000 | TTCGCCGCCTGCAACTCATTC     | ACGACTCCTTCCTCTGCTTCTCTC  |
| GLYMA_15G129700 | GTCTCTTCCTGGTTCGCCTG      | AGCACATGATTGCATCGGGA      |
| GLYMA_09G023600 | TCTTTTCAGGGTTTTCATCTCTC   | ACATGAAGGCTAGGCAGTGAT     |
| GLYMA_08G124400 | AGTGGTCAACGCCAACATCA      | AGTAGCTTTTGAAAGGAACGCC    |
| GLYMA_05G166400 | ACAGGTGGAGGCTTTGGAGAGG    | TCACGACATCTGCGATTCTGGAAC  |
| GLYMA_11G145800 | TTGCTACAAATCGGACCCTGG-3'  | CACACTGCGGACATATTGGC-3'   |
| GLYMA_19G147900 | TGCACAGAAAGTGCTTCTAAACTG  | GCTTCCAGACAAATCGTGATGA    |
| GLYMA_12G075800 | AGTGCCCTAAGCCTAGTTCTCTGAG | AGTAGTTGCTGCTGATGGAGTATGC |

**Table S2.** The homologous proteins of HD-ZIP III in legumes.

| Name       | Scientific Name         | Accession      | E value | Query Cover |
|------------|-------------------------|----------------|---------|-------------|
| AhHB8-L-1  | <i>Arachis hypogaea</i> | XP_025681305.1 | 0       | 0.98        |
| AhHB8-L-2  | <i>Arachis hypogaea</i> | XP_025623723.1 | 0       | 0.98        |
| AhHB15-L-1 | <i>Arachis hypogaea</i> | XP_025674176.1 | 0       | 0.98        |
| AhHB15-L-2 | <i>Arachis hypogaea</i> | XP_025610204.1 | 0       | 0.98        |
| AhHB15-L-3 | <i>Arachis hypogaea</i> | RYR49685.1     | 0       | 0.98        |
| AhHB8-L-3  | <i>Arachis hypogaea</i> | RYQ85287.1     | 0       | 0.98        |
| AhREV-L-1  | <i>Arachis hypogaea</i> | XP_025685402.1 | 0       | 0.99        |
| AhREV-L-2  | <i>Arachis hypogaea</i> | QHN98691.1     | 0       | 0.99        |
| AhHB14-L-1 | <i>Arachis hypogaea</i> | XP_025646247.1 | 0       | 0.99        |
| AhHB14-L-2 | <i>Arachis hypogaea</i> | XP_025694278.1 | 0       | 0.99        |
| AhREV-L-3  | <i>Arachis hypogaea</i> | RYR23266.1     | 0       | 0.99        |
| AhHB8-L-4  | <i>Arachis hypogaea</i> | RYR33648.1     | 0       | 0.78        |
| AhREV-L-4  | <i>Arachis hypogaea</i> | QHO30808.1     | 0       | 0.99        |
| AhREV-L-5  | <i>Arachis hypogaea</i> | XP_025614062.1 | 0       | 0.99        |
| AhREV-L-6  | <i>Arachis hypogaea</i> | XP_025670948.1 | 0       | 0.99        |
| AhREV-L-7  | <i>Arachis hypogaea</i> | RYR42882.1     | 0       | 0.99        |
| AhREV-L-8  | <i>Arachis hypogaea</i> | RYQ97997.1     | 0       | 0.99        |
| CaHB15-L-1 | <i>Cicer arietinum</i>  | XP_004510296.1 | 0       | 0.99        |
| CaHB8-L-1  | <i>Cicer arietinum</i>  | XP_004501146.1 | 0       | 0.98        |
| CaHB15-L-2 | <i>Cicer arietinum</i>  | XP_004486776.1 | 0       | 0.98        |
| CaHB14-L-1 | <i>Cicer arietinum</i>  | XP_004486450.1 | 0       | 0.99        |
| CaREV-L-1  | <i>Cicer arietinum</i>  | XP_004505999.1 | 0       | 0.99        |
| CaHB14-L-2 | <i>Cicer arietinum</i>  | XP_004504217.1 | 0       | 0.99        |
| GmHB8-L-1  | <i>Glycine max</i>      | XP_003522716.1 | 0       | 0.98        |
| GmHB8-L-2  | <i>Glycine max</i>      | XP_003526496.1 | 0       | 0.98        |
| GmHB15-L-1 | <i>Glycine max</i>      | XP_003531652.1 | 0       | 0.99        |
| GmHB15-L-2 | <i>Glycine max</i>      | XP_003530109.1 | 0       | 0.99        |
| GmHB15-L-3 | <i>Glycine max</i>      | XP_003530112.1 | 0       | 0.99        |
| GmHB15-L-4 | <i>Glycine max</i>      | XP_003531653.1 | 0       | 0.98        |
| GmHB14-L-1 | <i>Glycine max</i>      | XP_003546255.1 | 0       | 0.99        |

|             |                            |                |   |      |
|-------------|----------------------------|----------------|---|------|
| GmHB14-L-2  | <i>Glycine max</i>         | XP_003535078.1 | 0 | 0.99 |
| GmREV-L-1   | <i>Glycine max</i>         | XP_003538150.1 | 0 | 0.99 |
| GmHB14-L-3  | <i>Glycine max</i>         | XP_003532788.1 | 0 | 0.99 |
| GmHB14-L-4  | <i>Glycine max</i>         | XP_003524993.1 | 0 | 0.99 |
| GsHB8-L-1   | <i>Glycine soja</i>        | KHN10188.1     | 0 | 0.98 |
| GsHB8-L-2   | <i>Glycine soja</i>        | KHN18159.1     | 0 | 0.98 |
| GsHB8-L-3   | <i>Glycine soja</i>        | RZC15680.1     | 0 | 0.98 |
| GsHB15-L-1  | <i>Glycine soja</i>        | RZB97876.1     | 0 | 0.99 |
| GsHB15-L-2  | <i>Glycine soja</i>        | RZC00893.1     | 0 | 0.99 |
| GsHB15-L-3  | <i>Glycine soja</i>        | KHN39244.1     | 0 | 0.99 |
| GsHB15-L-4  | <i>Glycine soja</i>        | KHN39243.1     | 0 | 0.99 |
| GsHB15-L-5  | <i>Glycine soja</i>        | XP_028244500.1 | 0 | 0.89 |
| GsHB14-L-1  | <i>Glycine soja</i>        | RZB90278.1     | 0 | 0.99 |
| GsREV-L-1   | <i>Glycine soja</i>        | XP_028194395.1 | 0 | 0.99 |
| GsREV-L-2   | <i>Glycine soja</i>        | KHN38761.1     | 0 | 0.99 |
| GsREV-L-3   | <i>Glycine soja</i>        | KHN05682.1     | 0 | 0.99 |
| GsHB14-L-2  | <i>Glycine soja</i>        | XP_028232949.1 | 0 | 0.99 |
| GsHOX32-L-1 | <i>Glycine soja</i>        | KHN06475.1     | 0 | 0.99 |
| GsHOX32-L-2 | <i>Glycine soja</i>        | KHN48072.1     | 0 | 0.98 |
| MtrHB8-L-1  | <i>Medicago truncatula</i> | XP_003603630.2 | 0 | 0.98 |
| MtrHB15-L-1 | <i>Medicago truncatula</i> | XP_003627005.1 | 0 | 0.99 |
| MtrHB15-L-2 | <i>Medicago truncatula</i> | XP_003597690.1 | 0 | 0.98 |
| MtrHB14-L-1 | <i>Medicago truncatula</i> | XP_003594520.2 | 0 | 0.98 |
| MtrREV-L-1  | <i>Medicago truncatula</i> | XP_013456006.1 | 0 | 0.99 |
| PvHB8-L-1   | <i>Phaseolus vulgaris</i>  | XP_007137231.1 | 0 | 0.98 |
| PvHB15-L-1  | <i>Phaseolus vulgaris</i>  | XP_007150614.1 | 0 | 0.98 |
| PvHB15-L-2  | <i>Phaseolus vulgaris</i>  | XP_007135643.1 | 0 | 0.99 |
| PvHB14-L-1  | <i>Phaseolus vulgaris</i>  | XP_007147487.1 | 0 | 0.99 |
| PvREV-L-1   | <i>Phaseolus vulgaris</i>  | XP_007132262.1 | 0 | 0.99 |
| PvHB14-L-2  | <i>Phaseolus vulgaris</i>  | XP_007159548.1 | 0 | 0.98 |

Table S3. Basic physical and chemical information of soybean HD-ZIP III proteins.

| Gene ID         | Gm HD-ZIP III | Number of amino acids | Theoretical pI | Molecular weight /Da | Instability index | Grand average of hydropathicity | SL      |
|-----------------|---------------|-----------------------|----------------|----------------------|-------------------|---------------------------------|---------|
| GLYMA_04G085000 | GmHB8-L-1     | 844                   | 6.03           | 92741.09             | 47.06             | -0.108                          | nucleus |
| GLYMA_06G086600 | GmHB8-L-2     | 845                   | 6.03           | 92923.27             | 47.63             | -0.102                          | nucleus |
| GLYMA_08G201900 | GmHB15-L-1    | 838                   | 6.06           | 92386.59             | 45.74             | -0.141                          | nucleus |
| GLYMA_07G016500 | GmHB15-L-2    | 838                   | 6.06           | 92450.72             | 45.94             | -0.140                          | nucleus |
| GLYMA_07G016700 | GmHB15-L-3    | 841                   | 6.12           | 92947.16             | 47.68             | -0.180                          | nucleus |
| GLYMA_08G202000 | GmHB15-L-4    | 843                   | 6.17           | 93335.68             | 46.7              | -0.180                          | nucleus |
| GLYMA_15G129700 | GmHB14-L-1    | 846                   | 5.89           | 92842.00             | 51.05             | -0.134                          | nucleus |
| GLYMA_09G023600 | GmHB14-L-2    | 846                   | 5.89           | 92779.67             | 48.46             | -0.140                          | nucleus |
| GLYMA_08G124400 | GmHB14-L-3    | 849                   | 6.25           | 93367.67             | 48.99             | -0.115                          | nucleus |
| GLYMA_05G166400 | GmHB14-L-4    | 853                   | 6.06           | 93958.15             | 50.47             | -0.133                          | nucleus |
| GLYMA_11G145800 | GmREV-L-1     | 842                   | 5.75           | 92062.93             | 47.29             | -0.080                          | nucleus |
| GLYMA_12G075800 | GmREV-L-2     | 841                   | 5.75           | 92012.89             | 47.36             | -0.087                          | nucleus |

**Table S4.** cis-acting elements in the promoter region of GmHD-Zip III family gene.

| Gene ID           | The bases  | Cis acting element                                                |
|-------------------|------------|-------------------------------------------------------------------|
| GLYMA_04G085000.1 | CTAACGTATT | cis-acting element involved in light responsiveness               |
| GLYMA_04G085000.1 | AACGAC     | auxin-responsive element                                          |
| GLYMA_04G085000.1 | TGACGTAA   | part of an auxin-responsive element                               |
| GLYMA_04G085000.1 | CACGTG     | cis-acting regulatory element involved in light responsiveness    |
| GLYMA_04G085000.1 | CACGTT     | cis-acting regulatory element involved in light responsiveness    |
| GLYMA_04G085000.1 | CACGTG     | cis-acting regulatory element involved in light responsiveness    |
| GLYMA_04G085000.1 | CACGAC     | cis-acting regulatory element involved in light responsiveness    |
| GLYMA_04G085000.1 | TACGTG     | cis-acting regulatory element involved in light responsiveness    |
| GLYMA_04G085000.1 | CGCACGTGTC | cis-acting element involved in the abscisic acid responsiveness   |
| GLYMA_04G085000.1 | CACGTG     | cis-acting element involved in the abscisic acid responsiveness   |
| GLYMA_04G085000.1 | ACGTG      | cis-acting element involved in the abscisic acid responsiveness   |
| GLYMA_04G085000.1 | ACGTG      | cis-acting element involved in the abscisic acid responsiveness   |
| GLYMA_04G085000.1 | ACGTG      | cis-acting element involved in the abscisic acid responsiveness   |
| GLYMA_04G085000.1 | GGTTAA     | light responsive element                                          |
| GLYMA_04G085000.1 | CGTCA      | cis-acting regulatory element involved in the MeJA-responsiveness |
| GLYMA_04G085000.1 | CGTCA      | cis-acting regulatory element involved in the MeJA-responsiveness |
| GLYMA_04G085000.1 | CGTCA      | cis-acting regulatory element involved in the MeJA-responsiveness |
| GLYMA_04G085000.1 | CAACTG     | MYB binding site involved in drought-inducibility                 |
| GLYMA_04G085000.1 | CAACTG     | MYB binding site involved in drought-inducibility                 |
| GLYMA_04G085000.1 | CAACTG     | MYB binding site involved in drought-inducibility                 |
| GLYMA_04G085000.1 | ATTCTCTAAC | cis-acting element involved in defense and stress responsiveness  |
| GLYMA_04G085000.1 | GTTTTCTTAC | cis-acting element involved in defense and stress responsiveness  |
| GLYMA_04G085000.1 | TGACG      | cis-acting regulatory element involved in the MeJA-responsiveness |
| GLYMA_04G085000.1 | TGACG      | cis-acting regulatory element involved in the MeJA-responsiveness |
| GLYMA_04G085000.1 | TGACG      | cis-acting regulatory element involved in the MeJA-responsiveness |
| GLYMA_04G085000.1 | TCTGTTG    | gibberellin-responsive element                                    |
| GLYMA_04G085000.1 | CCGAAA     | cis-acting element involved in low-temperature responsiveness     |
| GLYMA_04G085000.1 | GGTCCAT    | cis-acting regulatory element involved in auxin responsiveness    |
| GLYMA_05G166400.1 | CAACTG     | MYB binding site involved in drought-inducibility                 |
| GLYMA_05G166400.1 | CAACTG     | MYB binding site involved in drought-inducibility                 |
| GLYMA_05G166400.1 | CAACTG     | MYB binding site involved in drought-inducibility                 |
| GLYMA_05G166400.1 | CAACTG     | MYB binding site involved in drought-inducibility                 |
| GLYMA_05G166400.1 | CAACTG     | MYB binding site involved in drought-inducibility                 |
| GLYMA_05G166400.1 | CGTCA      | cis-acting regulatory element involved in the MeJA-responsiveness |
| GLYMA_05G166400.1 | CCGAAA     | cis-acting element involved in low-temperature responsiveness     |
| GLYMA_05G166400.1 | TGACG      | cis-acting regulatory element involved in the MeJA-responsiveness |
| GLYMA_05G166400.1 | AACGAC     | auxin-responsive element                                          |
| GLYMA_05G166400.1 | TCTTAC     | part of a light responsive element                                |
| GLYMA_05G166400.1 | TCTTAC     | part of a light responsive element                                |
| GLYMA_05G166400.1 | CACGAC     | cis-acting regulatory element involved in light responsiveness    |
| GLYMA_06G086600.1 | CACGTG     | cis-acting element involved in the abscisic acid responsiveness   |
| GLYMA_06G086600.1 | ACGTG      | cis-acting element involved in the abscisic acid responsiveness   |
| GLYMA_06G086600.1 | ACGTG      | cis-acting element involved in the abscisic acid responsiveness   |
| GLYMA_06G086600.1 | CACGTG     | cis-acting regulatory element involved in light responsiveness    |
| GLYMA_06G086600.1 | CACGAC     | cis-acting regulatory element involved in light responsiveness    |
| GLYMA_06G086600.1 | CACGTG     | cis-acting regulatory element involved in light responsiveness    |
| GLYMA_06G086600.1 | CACGTT     | cis-acting regulatory element involved in light responsiveness    |
| GLYMA_06G086600.1 | AACGAC     | auxin-responsive element                                          |
| GLYMA_06G086600.1 | TGACGTAA   | part of an auxin-responsive element                               |

|                   |            |                                                                   |
|-------------------|------------|-------------------------------------------------------------------|
| GLYMA_06G086600.1 | CTAACGTATT | cis-acting element involved in light responsiveness               |
| GLYMA_06G086600.1 | CCGAAA     | cis-acting element involved in low-temperature responsiveness     |
| GLYMA_06G086600.1 | GGTCCAT    | cis-acting regulatory element involved in auxin responsiveness    |
| GLYMA_06G086600.1 | GGGCGG     | light responsive element                                          |
| GLYMA_06G086600.1 | TGACG      | cis-acting regulatory element involved in the MeJA-responsiveness |
| GLYMA_06G086600.1 | TGACG      | cis-acting regulatory element involved in the MeJA-responsiveness |
| GLYMA_06G086600.1 | TGACG      | cis-acting regulatory element involved in the MeJA-responsiveness |
| GLYMA_06G086600.1 | TGACG      | cis-acting regulatory element involved in the MeJA-responsiveness |
| GLYMA_06G086600.1 | TGACG      | cis-acting regulatory element involved in the MeJA-responsiveness |
| GLYMA_06G086600.1 | TCTGTTG    | gibberellin-responsive element                                    |
| GLYMA_06G086600.1 | TCTGTTG    | gibberellin-responsive element                                    |
| GLYMA_06G086600.1 | CAACTG     | MYB binding site involved in drought-inducibility                 |
| GLYMA_06G086600.1 | CAACTG     | MYB binding site involved in drought-inducibility                 |
| GLYMA_06G086600.1 | ATTCTCTAAC | cis-acting element involved in defense and stress responsiveness  |
| GLYMA_06G086600.1 | GTTTTCTTAC | cis-acting element involved in defense and stress responsiveness  |
| GLYMA_06G086600.1 | CGTCA      | cis-acting regulatory element involved in the MeJA-responsiveness |
| GLYMA_06G086600.1 | CGTCA      | cis-acting regulatory element involved in the MeJA-responsiveness |
| GLYMA_06G086600.1 | CGTCA      | cis-acting regulatory element involved in the MeJA-responsiveness |
| GLYMA_06G086600.1 | CGTCA      | cis-acting regulatory element involved in the MeJA-responsiveness |
| GLYMA_06G086600.1 | CGTCA      | cis-acting regulatory element involved in the MeJA-responsiveness |
| GLYMA_06G086600.1 | CGTCA      | cis-acting regulatory element involved in the MeJA-responsiveness |
| GLYMA_07G016500.1 | CGTCA      | cis-acting regulatory element involved in the MeJA-responsiveness |
| GLYMA_07G016500.1 | CGTCA      | cis-acting regulatory element involved in the MeJA-responsiveness |
| GLYMA_07G016500.1 | CGTCA      | cis-acting regulatory element involved in the MeJA-responsiveness |
| GLYMA_07G016500.1 | CGTCA      | cis-acting regulatory element involved in the MeJA-responsiveness |
| GLYMA_07G016500.1 | CAACTG     | MYB binding site involved in drought-inducibility                 |
| GLYMA_07G016500.1 | TGACG      | cis-acting regulatory element involved in the MeJA-responsiveness |
| GLYMA_07G016500.1 | TGACG      | cis-acting regulatory element involved in the MeJA-responsiveness |
| GLYMA_07G016500.1 | TGACG      | cis-acting regulatory element involved in the MeJA-responsiveness |
| GLYMA_07G016500.1 | TGACG      | cis-acting regulatory element involved in the MeJA-responsiveness |
| GLYMA_07G016500.1 | TGACG      | cis-acting regulatory element involved in the MeJA-responsiveness |
| GLYMA_07G016500.1 | AGAAACTT   | part of a module for light response                               |
| GLYMA_07G016500.1 | AGTAATCT   | part of a conserved DNA module involved in light responsiveness   |
| GLYMA_07G016700.1 | CACGTC     | cis-acting regulatory element involved in light responsiveness    |
| GLYMA_07G016700.1 | ACGTG      | cis-acting element involved in the abscisic acid responsiveness   |
| GLYMA_07G016700.1 | TGACG      | cis-acting regulatory element involved in the MeJA-responsiveness |
| GLYMA_07G016700.1 | TGACG      | cis-acting regulatory element involved in the MeJA-responsiveness |
| GLYMA_07G016700.1 | TGACG      | cis-acting regulatory element involved in the MeJA-responsiveness |
| GLYMA_07G016700.1 | TGACG      | cis-acting regulatory element involved in the MeJA-responsiveness |
| GLYMA_07G016700.1 | AGAAACTT   | part of a module for light response                               |
| GLYMA_07G016700.1 | AACCTAA    | MYB binding site involved in light responsiveness                 |
| GLYMA_07G016700.1 | CGTCA      | cis-acting regulatory element involved in the MeJA-responsiveness |
| GLYMA_07G016700.1 | CGTCA      | cis-acting regulatory element involved in the MeJA-responsiveness |
| GLYMA_07G016700.1 | CGTCA      | cis-acting regulatory element involved in the MeJA-responsiveness |
| GLYMA_07G016700.1 | CGTCA      | cis-acting regulatory element involved in the MeJA-responsiveness |
| GLYMA_07G016700.1 | CAACTG     | MYB binding site involved in drought-inducibility                 |
| GLYMA_08G124400.1 | AGAAACTT   | part of a module for light response                               |
| GLYMA_08G124400.1 | TGACG      | cis-acting regulatory element involved in the MeJA-responsiveness |
| GLYMA_08G124400.1 | TGACG      | cis-acting regulatory element involved in the MeJA-responsiveness |
| GLYMA_08G124400.1 | CAACTG     | MYB binding site involved in drought-inducibility                 |
| GLYMA_08G124400.1 | CAACTG     | MYB binding site involved in drought-inducibility                 |



|                   |          |                                                                   |
|-------------------|----------|-------------------------------------------------------------------|
| GLYMA_08G124400.1 | CAACTG   | MYB binding site involved in drought-inducibility                 |
| GLYMA_08G124400.1 | CAACTG   | MYB binding site involved in drought-inducibility                 |
| GLYMA_08G124400.1 | CAACTG   | MYB binding site involved in drought-inducibility                 |
| GLYMA_08G124400.1 | CGTCA    | cis-acting regulatory element involved in the MeJA-responsiveness |
| GLYMA_08G124400.1 | CGTCA    | cis-acting regulatory element involved in the MeJA-responsiveness |
| GLYMA_08G124400.1 | TCTTAC   | part of a light responsive element                                |
| GLYMA_08G124400.1 | TCTTAC   | part of a light responsive element                                |
| GLYMA_08G124400.1 | CACGAC   | cis-acting regulatory element involved in light responsiveness    |
| GLYMA_08G124400.1 | AACGAC   | auxin-responsive element                                          |
| GLYMA_08G201900.1 | AGAAACTT | part of a module for light response                               |
| GLYMA_08G201900.1 | TGACG    | cis-acting regulatory element involved in the MeJA-responsiveness |
| GLYMA_08G201900.1 | TGACG    | cis-acting regulatory element involved in the MeJA-responsiveness |
| GLYMA_08G201900.1 | TGACG    | cis-acting regulatory element involved in the MeJA-responsiveness |
| GLYMA_08G201900.1 | TGACG    | cis-acting regulatory element involved in the MeJA-responsiveness |
| GLYMA_08G201900.1 | CAACTG   | MYB binding site involved in drought-inducibility                 |
| GLYMA_08G201900.1 | CGTCA    | cis-acting regulatory element involved in the MeJA-responsiveness |
| GLYMA_08G201900.1 | CGTCA    | cis-acting regulatory element involved in the MeJA-responsiveness |
| GLYMA_08G201900.1 | CGTCA    | cis-acting regulatory element involved in the MeJA-responsiveness |
| GLYMA_08G201900.1 | CGTCA    | cis-acting regulatory element involved in the MeJA-responsiveness |
| GLYMA_08G202000.1 | AGAAACTT | part of a module for light response                               |
| GLYMA_08G202000.1 | TGACG    | cis-acting regulatory element involved in the MeJA-responsiveness |
| GLYMA_08G202000.1 | TGACG    | cis-acting regulatory element involved in the MeJA-responsiveness |
| GLYMA_08G202000.1 | TGACG    | cis-acting regulatory element involved in the MeJA-responsiveness |
| GLYMA_08G202000.1 | TGACG    | cis-acting regulatory element involved in the MeJA-responsiveness |
| GLYMA_08G202000.1 | TGACG    | cis-acting regulatory element involved in the MeJA-responsiveness |
| GLYMA_08G202000.1 | GGGCGG   | light responsive element                                          |
| GLYMA_08G202000.1 | AACCTAA  | MYB binding site involved in light responsiveness                 |
| GLYMA_08G202000.1 | CGTCA    | cis-acting regulatory element involved in the MeJA-responsiveness |
| GLYMA_08G202000.1 | CGTCA    | cis-acting regulatory element involved in the MeJA-responsiveness |
| GLYMA_08G202000.1 | CGTCA    | cis-acting regulatory element involved in the MeJA-responsiveness |
| GLYMA_08G202000.1 | CGTCA    | cis-acting regulatory element involved in the MeJA-responsiveness |
| GLYMA_08G202000.1 | CGTCA    | cis-acting regulatory element involved in the MeJA-responsiveness |
| GLYMA_08G202000.1 | GGTTAAT  | light responsive element                                          |
| GLYMA_08G202000.1 | ACGTG    | cis-acting element involved in the abscisic acid responsiveness   |
| GLYMA_08G202000.1 | ACGTG    | cis-acting element involved in the abscisic acid responsiveness   |
| GLYMA_08G202000.1 | TACGTG   | cis-acting regulatory element involved in light responsiveness    |
| GLYMA_08G202000.1 | CACGTC   | cis-acting regulatory element involved in light responsiveness    |
| GLYMA_08G202000.1 | AACGAC   | auxin-responsive element                                          |
| GLYMA_09G023600.1 | CACGTG   | cis-acting element involved in the abscisic acid responsiveness   |
| GLYMA_09G023600.1 | ACGTG    | cis-acting element involved in the abscisic acid responsiveness   |
| GLYMA_09G023600.1 | TCTCCCT  | part of a light responsive element                                |
| GLYMA_09G023600.1 | CACGAC   | cis-acting regulatory element involved in light responsiveness    |
| GLYMA_09G023600.1 | CACGAC   | cis-acting regulatory element involved in light responsiveness    |
| GLYMA_09G023600.1 | CACGAC   | cis-acting regulatory element involved in light responsiveness    |
| GLYMA_09G023600.1 | CACGTG   | cis-acting regulatory element involved in light responsiveness    |
| GLYMA_09G023600.1 | CACGTG   | cis-acting regulatory element involved in light responsiveness    |
| GLYMA_09G023600.1 | CTTTATCA | part of a light responsive element                                |
| GLYMA_09G023600.1 | TCTGTTG  | gibberellin-responsive element                                    |
| GLYMA_09G023600.1 | TCTGTTG  | gibberellin-responsive element                                    |
| GLYMA_09G023600.1 | CCGAAA   | cis-acting element involved in low-temperature responsiveness     |
| GLYMA_09G023600.1 | CAACTG   | MYB binding site involved in drought-inducibility                 |

---

|                   |                |                                                                       |
|-------------------|----------------|-----------------------------------------------------------------------|
| GLYMA_09G023600.1 | CAACTG         | MYB binding site involved in drought-inducibility                     |
| GLYMA_11G145800.1 | CAACTG         | MYB binding site involved in drought-inducibility                     |
| GLYMA_11G145800.1 | CAACTG         | MYB binding site involved in drought-inducibility                     |
| GLYMA_11G145800.1 | TCTCACCAACCACA | light responsive element                                              |
| GLYMA_11G145800.1 | CGTCA          | cis-acting regulatory element involved in the MeJA-responsiveness     |
| GLYMA_11G145800.1 | CCTTTTG        | gibberellin-responsive element                                        |
| GLYMA_11G145800.1 | AACCTAA        | MYB binding site involved in light responsiveness                     |
| GLYMA_11G145800.1 | TAAGAGAGGAA    | light responsive element                                              |
| GLYMA_11G145800.1 | AGAAACAA       | part of a module for light response                                   |
| GLYMA_11G145800.1 | GATAGGA        | part of a light responsive element                                    |
| GLYMA_11G145800.1 | TGACG          | cis-acting regulatory element involved in the MeJA-responsiveness     |
| GLYMA_11G145800.1 | TATCCCA        | cis-acting element involved in gibberellin-responsiveness             |
| GLYMA_11G145800.1 | GACACGTGGC     | cis-acting element involved in the abscisic acid responsiveness       |
| GLYMA_11G145800.1 | TCTCCCT        | part of a light responsive element                                    |
| GLYMA_11G145800.1 | TCTTAC         | part of a light responsive element                                    |
| GLYMA_11G145800.1 | TCTTAC         | part of a light responsive element                                    |
| GLYMA_15G129700.1 | CAACAAACCCCTT  | gibberellin-responsive element and part of a light responsive element |
| GLYMA_15G129700.1 | CAACTG         | MYB binding site involved in drought-inducibility                     |
| GLYMA_15G129700.1 | CAACTG         | MYB binding site involved in drought-inducibility                     |
| GLYMA_15G129700.1 | CAACTG         | MYB binding site involved in drought-inducibility                     |
| GLYMA_15G129700.1 | CAACTG         | MYB binding site involved in drought-inducibility                     |
| GLYMA_15G129700.1 | TCTGTTG        | gibberellin-responsive element                                        |
| GLYMA_15G129700.1 | CTTTATCA       | part of a light responsive element                                    |
| GLYMA_15G129700.1 | TCTTAC         | part of a light responsive element                                    |
| GLYMA_15G129700.1 | CACGAC         | cis-acting regulatory element involved in light responsiveness        |
| GLYMA_15G129700.1 | CACGAC         | cis-acting regulatory element involved in light responsiveness        |
| GLYMA_15G129700.1 | CACGAC         | cis-acting regulatory element involved in light responsiveness        |

---
